# Supplementary material for: Be2B6 and Be2B7+: two double aromatic inverse sandwich complexes with spin-triplet ground state
Source: Royal Society of Chemistry journal article supplement (doi:10.1039/c9nj02819f), 2019-01-01
Supplement: c9nj02819f1.pdf [file c9nj02819f1.pdf]

Electronic Supplementary Material (ESI) for New Journal of Chemistry.  
This journal is © The Royal Society of Chemistry and the Centre National de la Recherche Scientifique 2019

## SUPPORTING INFORMATION

### **Be<sub>2</sub>B<sub>6</sub> and Be<sub>2</sub>B<sub>7</sub><sup>+</sup>: two double aromatic inverse sandwich complexes with spin-triplet ground state**

Ying-Jin Wang,\* Chang-Qing Miao, Jing-Jing Xie, Ya-Ru Wei, and Guang-Ming Ren

*Department of Chemistry, Xinzhou Teachers University, Xinzhou 034000, China*

\*E-mail: yingjinwang@sxu.edu.cn

## SUPPORTING INFORMATION

**Table S1.** Cartesian coordinates for global-minimum (GM) structures of (a) (*D*<sub>6h</sub>, <sup>3</sup>A<sub>1g</sub>) Be<sub>2</sub>B<sub>6</sub> and (b) (*D*<sub>7h</sub>, <sup>3</sup>A<sub>2'</sub>) Be<sub>2</sub>B<sub>7</sub><sup>+</sup> clusters at the PBE0/6-311+G\* level.

**Figure S1.** Alternative optimized structures of Be<sub>2</sub>B<sub>6</sub> cluster at the PBE0/6-311+G\* level. Relative energies are shown in eV at PBE0 level with corrections for zero-point energies (ZPEs), as well as for top two isomers (in square bracket) at the single-point CCSD(T)/6-311+G\*\*//PBE0/6-311+G\* level.

- Figure S2.** Alternative optimized structures of  $\text{Be}_2\text{B}_7^+$  cluster at the PBE0/6-311+G\* level. Relative energies are shown in eV at PBE0 level with corrections for zero-point energies (ZPEs), as well as for top two isomers (in square bracket) at the single-point CCSD(T)/6-311+G\*/PBE0/6-311+G\* level.
- Figure S3.** Canonical molecular orbitals (CMOs) of ( $D_{7h}$ ,  $^3A_2'$ )  $\text{Be}_2\text{B}_7^+$ . The CMOs are sorted to three subsets: (a) seven peripheral B–B  $\sigma$  single bonds; (b) globally delocalized  $4\sigma$  framework; (c) globally delocalized  $6\pi$  framework.
- Figure S4.** The adaptive natural density partitioning (AdNDP) bonding pattern of ( $D_{7h}$ ,  $^3A_2'$ )  $\text{Be}_2\text{B}_7^+$  cluster. Occupation numbers (ONs) are indicated.
- Figure S5.** Optimized structures of  $\text{Be}_2\text{B}_5^-$  cluster at the PBE0/6-311+G\* level. Relative energies are shown in eV at the single-point CCSD(T)/6-311+G\*/PBE0/6-311+G\* and PBE0/6-311+G\* (in square bracket) levels. The energies at the PBE0 level are corrected for zero-point energies (ZPEs).

**Figure S1.** Alternative optimized structures of  $\text{Be}_2\text{B}_6$  cluster at the PBE0/6-311+G\* level.

Relative energies are shown in eV at PBE0 level with corrections for zero-point energies (ZPEs), as well as for top two isomers (in square bracket) at the single-point CCSD(T)/6-311+G\*\*/PBE0/6-311+G\* level.

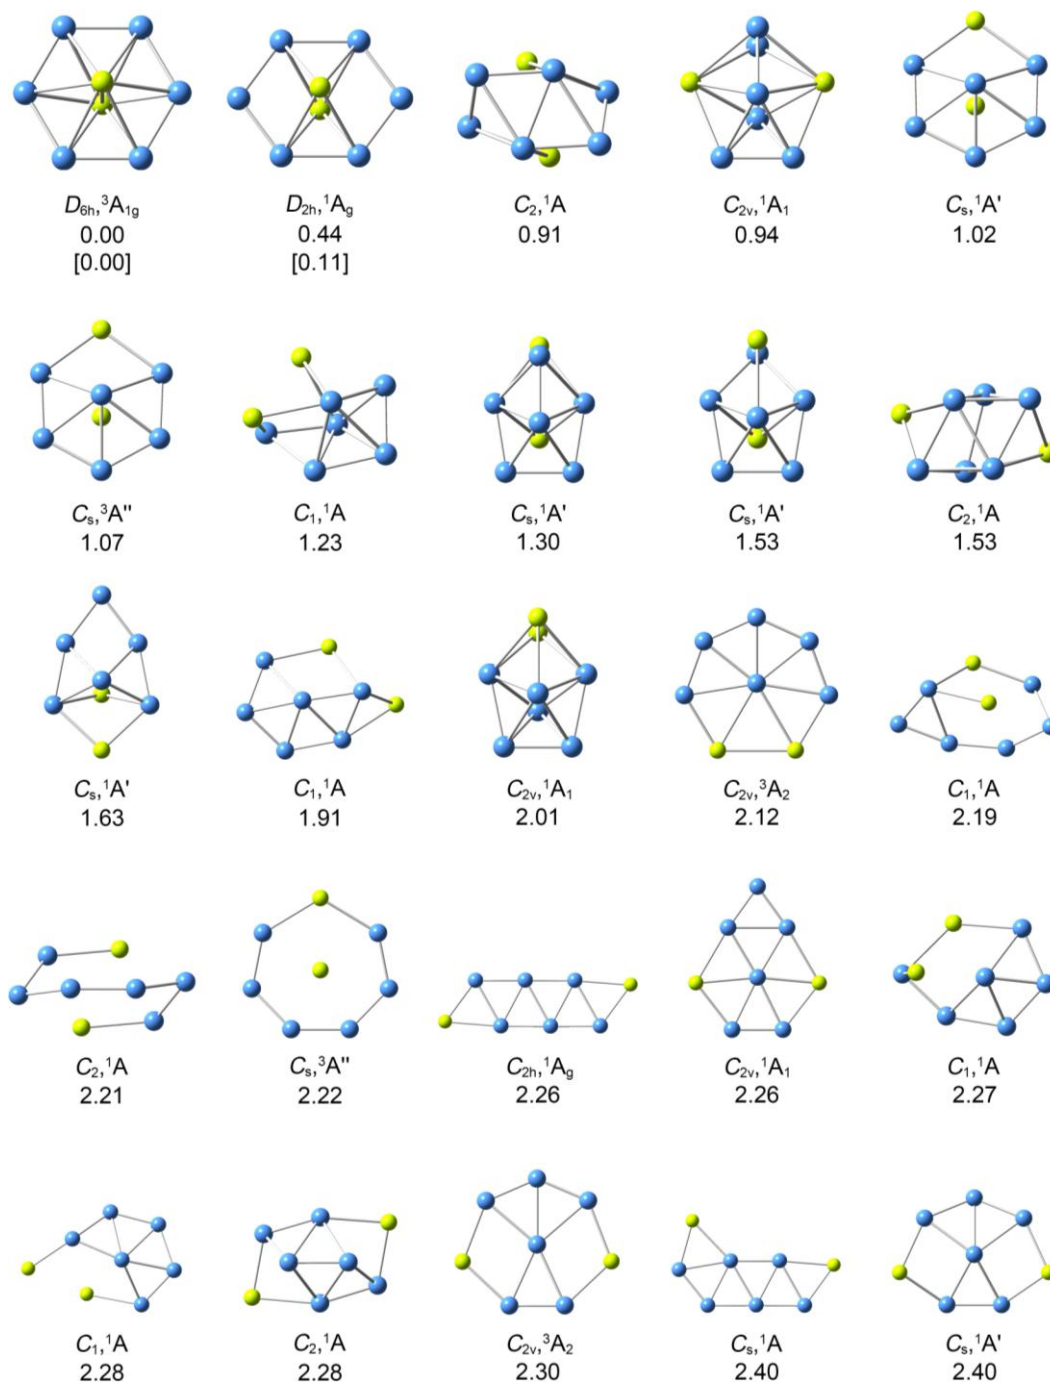

(continued ...)

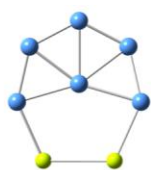

$C_{2v}, 1A$   
2.41

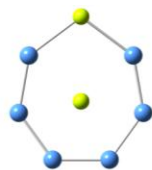

$C_{s}, 1A'$   
2.41

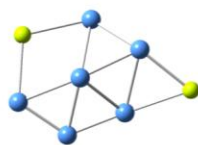

$C_{1}, 1A$   
2.43

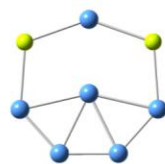

$C_{2v}, 1A_1$   
2.48

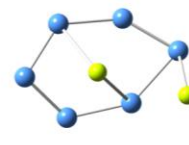

$C_{1}, 1A$   
2.53

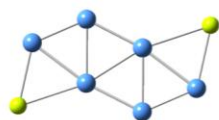

$C_{2h}, 1A_g$   
2.56

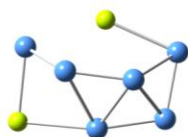

$C_{1}, 1A$   
2.63

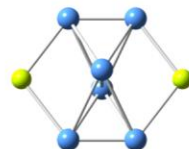

$D_{2h}, 1A_g$   
2.74

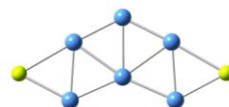

$C_{2v}, 1A_1$   
2.76

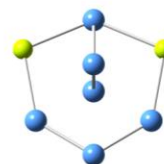

$C_{2v}, 1A_1$   
2.82

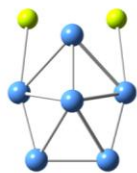

$C_{s}, 1A'$   
2.87

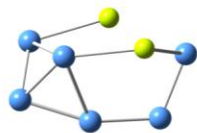

$C_{1}, 1A$   
3.03

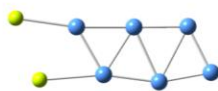

$C_{s}, 1A'$   
3.03

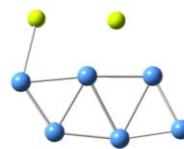

$C_{1}, 1A$   
3.06

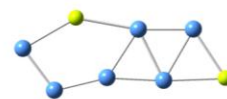

$C_{s}, 1A'$   
3.25

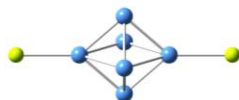

$D_{2h}, 1A_{1g}$   
5.81

**Figure S2.** Alternative optimized structures of  $\text{Be}_2\text{B}_7^+$  cluster at the PBE0/6-311+G\* level. Relative energies are shown in eV at PBE0 level with corrections for zero-point energies (ZPEs), as well as for top two isomers (in square bracket) at the single-point CCSD(T)/6-311+G\*\*/PBE0/6-311+G\* level.

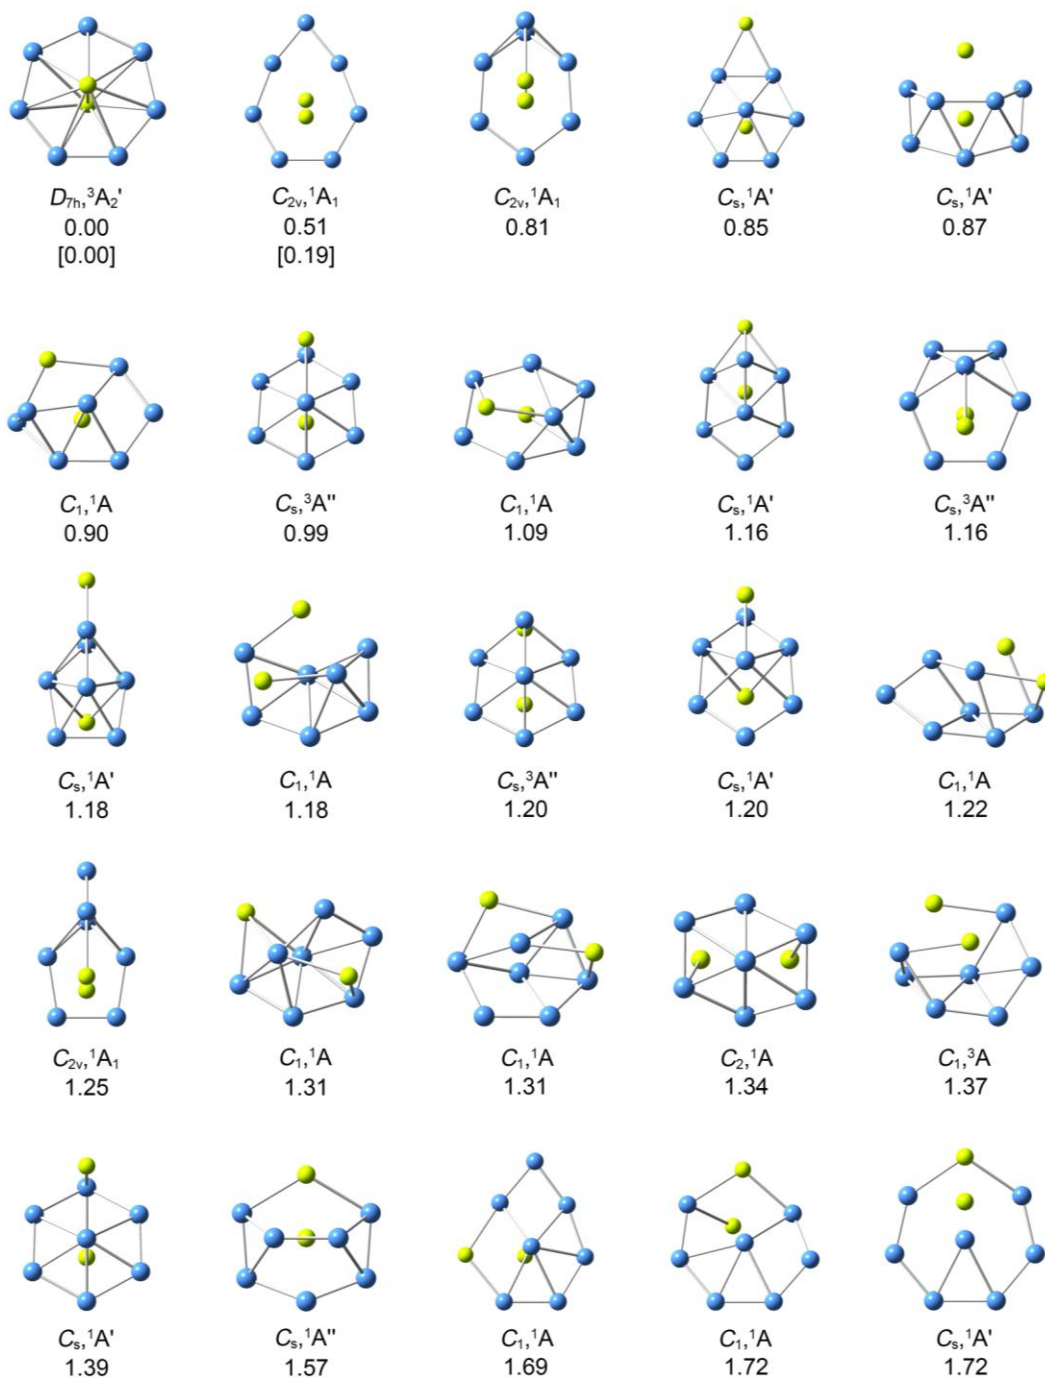

(continued ...)

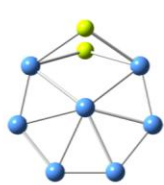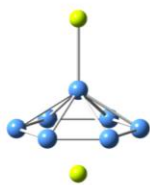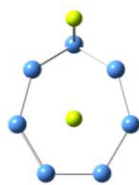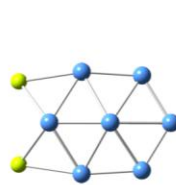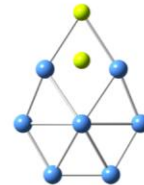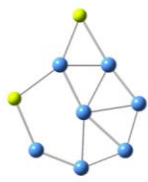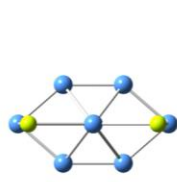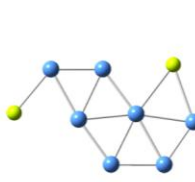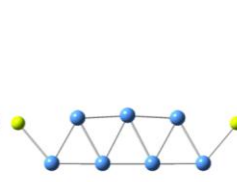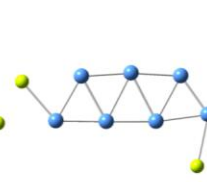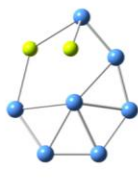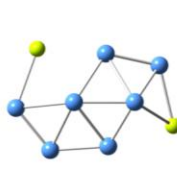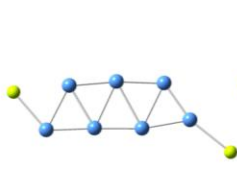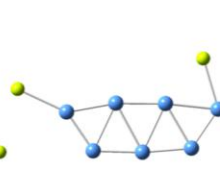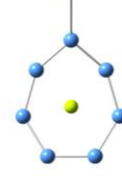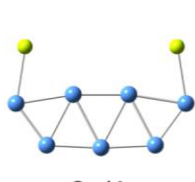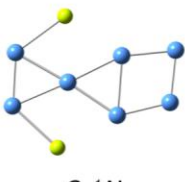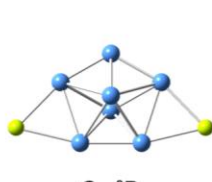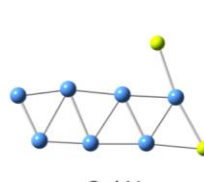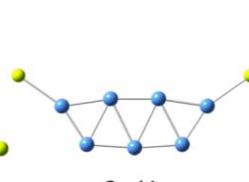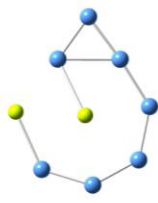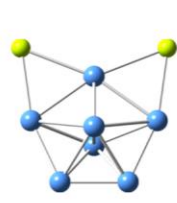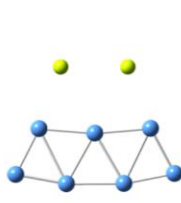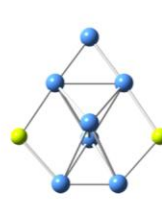

**Figure S3.** Canonical molecular orbitals (CMOs) of ( $D_{7h}$ ,  $^3A_2'$ )  $\text{Be}_2\text{B}_7^+$ . The CMOs are sorted to three subsets: (a) seven peripheral B–B  $\sigma$  single bonds; (b) globally delocalized  $4\sigma$  framework; (c) globally delocalized  $6\pi$  framework.

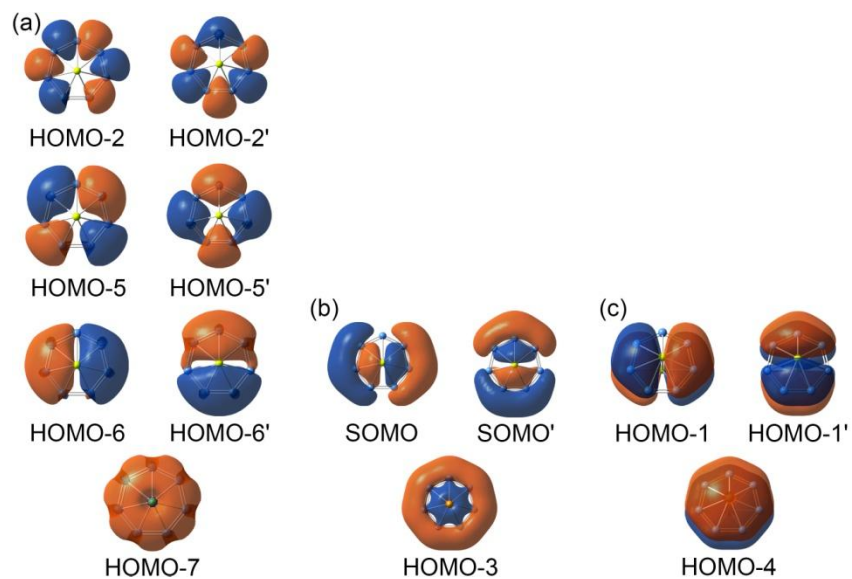

**Figure S4.** The adaptive natural density partitioning (AdNDP) bonding pattern of ( $D_{7h}$ ,  $^3A_2$ )  $Be_2B_7^+$  cluster. Occupation numbers (ONs) are indicated.

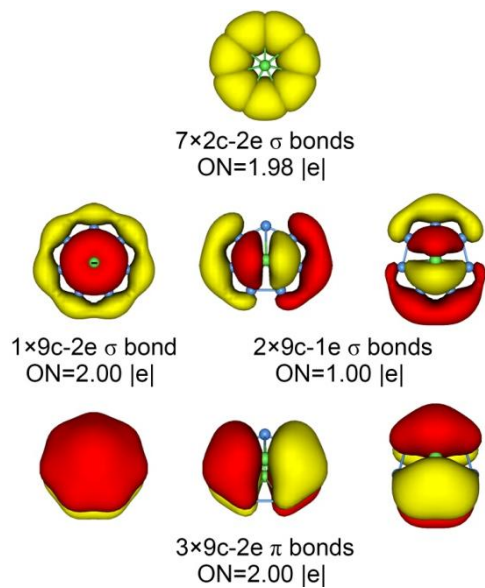



**Figure S5.** Optimized structures of  $\text{Be}_2\text{B}_5^-$  cluster at the PBE0/6-311+G\* level. Relative energies are shown in eV at the single-point CCSD(T)/6-311+G\*\*/PBE0/6-311+G\* and PBE0/6-311+G\* (in square bracket) levels. The energies at the PBE0 level are corrected for zero-point energies (ZPEs).

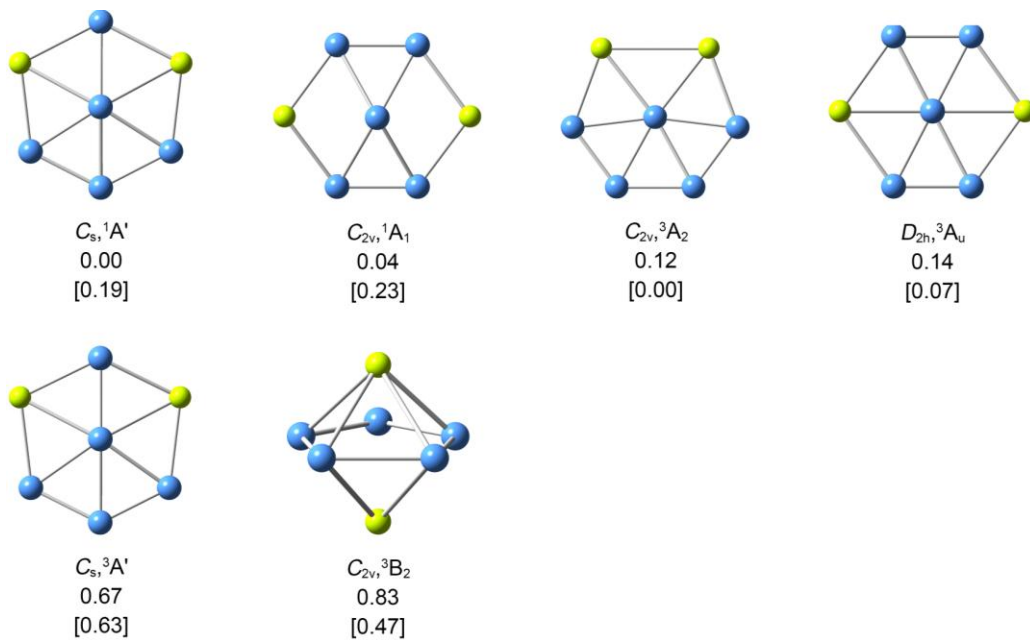

**Table S1.** Cartesian coordinates for global-minimum (GM) structures of (a) ( $D_{6h}$ ,  ${}^3A_{1g}$ )  $Be_2B_6$  and (b) ( $D_{7h}$ ,  ${}^3A_2'$ )  $Be_2B_7^+$  clusters at the PBE0/6-311+G\* level.

**(a)  $Be_2B_6$  ( $D_{6h}$ ,  ${}^3A_{1g}$ )**

|    |             |             |             |
|----|-------------|-------------|-------------|
| B  | 0.00000000  | 1.57221600  | 0.00000000  |
| B  | -1.36157900 | 0.78610800  | 0.00000000  |
| B  | -1.36157900 | -0.78610800 | 0.00000000  |
| B  | 0.00000000  | -1.57221600 | 0.00000000  |
| B  | 1.36157900  | -0.78610800 | 0.00000000  |
| B  | 1.36157900  | 0.78610800  | 0.00000000  |
| Be | 0.00000000  | 0.00000000  | 1.09717100  |
| Be | 0.00000000  | 0.00000000  | -1.09717100 |

**(b)  $Be_2B_7^+$  ( $D_{7h}$ ,  ${}^3A_2'$ )**

|    |             |             |             |
|----|-------------|-------------|-------------|
| B  | 0.00000000  | 1.77730400  | -0.00000000 |
| B  | -0.77114331 | -1.60129557 | -0.00000000 |
| B  | -1.73274328 | -0.39548735 | -0.00000000 |
| B  | 1.73274328  | -0.39548735 | -0.00000000 |
| B  | 1.38955222  | 1.10813092  | -0.00000000 |
| B  | -1.38955222 | 1.10813092  | -0.00000000 |
| B  | 0.77114331  | -1.60129557 | -0.00000000 |
| Be | 0.00000000  | -0.00000000 | 1.06748000  |
| Be | -0.00000000 | -0.00000000 | -1.06748000 |
